# Supplementary material for: De novo assembly ofAmorpha fruticosaL. transcriptome in response to drought stress provides insight into the tolerance mechanisms
Source: PeerJ journal article supplement (doi:10.7717/peerj.11044), 2021-03-22
Supplement: Raw_data.xls [file Raw_data.xls]

## Sheet: 20181225 - Chart Data - Format 
Note: The data derived from the instrument we use is the average of three repetitions, the D column is the upper error line, and the E column is the lower error line. Instrument Name:MxPro-Mx3000P Comparative Quantitation
31 ADH_zinc_N
W4	Replicate/Well ID	Relative Quantity (dR)	Upper Error Bars	Lower Error Bars
	0	1	1.42951	0.58839
	10% PEG	1.88946	1.94749	1.41197
	20% PEG	5.96524	3.17615	3.10218
	30% PEG	4.78983	3.5746	3.16747
33 zinc finger protein ZAT10
W4	Replicate/Well ID	Relative Quantity (dR)	Upper Error Bars	Lower Error Bars
	0	1	0.24788	0.19864
	10% PEG	3.88219	0.91496	0.88315
	20% PEG	8.63313	3.02359	2.31724
	30% PEG	35.8111	5.71226	6.04461
AfWRKY25
W4	Replicate/Well ID	Relative Quantity (dR)	Upper Error Bars	Lower Error Bars
	2	1	2.97374	0.74835
	4	0.95307	1.73033	0.58033
	6	3.70476	9.6141	2.39979
	8	1.33167	2.51922	0.83646
c164531.graph_c0 PP
W4	Replicate/Well ID	Relative Quantity (dR)	Upper Error Bars	Lower Error Bars
	0	1	0.25963	0.20612
	10% PEG	2.94575	0.84398	0.71309
	20% PEG	4.14198	1.79511	1.09496
	30% PEG	11.6684	3.95881	3.14926
c177655.graph_c0 DREB4
W4	Replicate/Well ID	Relative Quantity (dR)	Upper Error Bars	Lower Error Bars
	0	1	0.64247	0.39116
	10% PEG	0.314	0.20176	0.13881
	20% PEG	6.13748	2.37661	2.59894
	30% PEG	10.4997	3.39624	3.53951
c180821.graph_c0 RAP2
W4	Replicate/Well ID	Relative Quantity (dR)	Upper Error Bars	Lower Error Bars
	0	1	0.53938	0.35039
	10% PEG	1.31391	0.89517	0.68249
	20% PEG	6.47357	4.15427	2.59223
	30% PEG	22.8515	7.35751	6.47033
c194746.graph_c0 ABRE3
W4	Replicate/Well ID	Relative Quantity (dR)	Upper Error Bars	Lower Error Bars
	0	1	0.41909	0.29532
	10% PEG	1.35954	0.51807	0.38892
	20% PEG	1.54161	0.50473	0.3973
	30% PEG	10.1301	1.66336	1.55664
qRT-PCR AfNAC1
W4	Replicate/Well ID	Relative Quantity (dR)	Upper Error Bars	Lower Error Bars
	CK1	1	1.19015	0.54341
	10%-4	1.52827	1.25582	0.84631
	20%-7	57.7272	6.46805	4.01756
	30%-8	63.2518	9.90523	8.05318
35 bHLH-MYC transcription factors N
W4	Replicate/Well ID	Relative Quantity (dR)	Upper Error Bars	Lower Error Bars
	0	1	0.3169	0.24064
	10% PEG	0.43599	0.35702	0.31619
	20% PEG	0.33648	0.07095	0.06916
	30% PEG	0.01853	0.00471	0.00361
AfABP19a
W4	Replicate/Well ID	Relative Quantity (dR)	Upper Error Bars	Lower Error Bars
	0	1	0.18563	0.15657
	10% PEG	0.3622	0.11156	0.08364
	20% PEG	0.0807	0.02406	0.01805
	30% PEG	0.0289	0.00297	0.00237
AfPAP17-X2.tif
W4	Replicate/Well ID	Relative Quantity (dR)	Upper Error Bars	Lower Error Bars
	0	1	0.21038	0.23686
	10% PEG	1.56715	0.53394	0.69311
	20% PEG	0.28175	0.10754	0.07466
	30% PEG	0.2618	0.1454	0.12689
AfTrx-2
W4	Replicate/Well ID	Relative Quantity (dR)	Upper Error Bars	Lower Error Bars
	0	1	0.40734	0.47571
	10% PEG	0.82216	0.5078	0.53228
	20% PEG	0.53153	0.20835	0.22041
	30% PEG	0.7379	0.35243	0.31709
AfWRKY20
W4	Replicate/Well ID	Relative Quantity (dR)	Upper Error Bars	Lower Error Bars
	0	1	0.34061	0.35091
	10% PEG	0.31876	0.11557	0.10209
	20% PEG	1.50723	0.31338	0.329
	30% PEG	0.28395	0.17513	0.14046
c178617.graph_c0 MYB1
W4	Replicate/Well ID	Relative Quantity (dR)	Upper Error Bars	Lower Error Bars
	0	1	0.40485	0.44594
	10% PEG	0.20182	0.12025	0.09015
	20% PEG	0.41608	0.26546	0.23603
	30% PEG	0.28004	0.18318	0.1235
c185711.graph_c0 PAL1
W4	Replicate/Well ID	Relative Quantity (dR)	Upper Error Bars	Lower Error Bars
	0	1	0.34817	0.25826
	10% PEG	1.16283	0.32366	0.27817
	20% PEG	0.59059	0.21387	0.15158
	30% PEG	0.35215	0.21553	0.14698
MYB1 20181221
W4	Replicate/Well ID	Relative Quantity (dR)	Upper Error Bars	Lower Error Bars
	26-W4	1	2.11711	0.67919
	28-W4	0.13568	0.17702	0.08418
	30-W4	0.66003	0.83087	0.39302
	32-W4	0.24099	0.32147	0.1567
c168978.graph_c0 APX2
W4	Replicate/Well ID	Relative Quantity (dR)	Upper Error Bars	Lower Error Bars
	0	1	0.41226	0.29192
	10% PEG	1.71396	0.77034	0.59681
	20% PEG	1.77663	0.54923	0.42635
	30% PEG	3.98568	1.33516	0.99819
c170704.graph_c0 FeMn SOD
W4	Replicate/Well ID	Relative Quantity (dR)	Upper Error Bars	Lower Error Bars
	0	1	0.14928	0.12989
	10% PEG	1.05101	0.17464	0.15371
	20% PEG	2.92086	1.01831	0.66844
	30% PEG	11.1257	4.57546	2.94519
c181732.graph_c3 CAT
W4	Replicate/Well ID	Relative Quantity (dR)	Upper Error Bars	Lower Error Bars
	0	1	0.08064	0.07462
	10% PEG	0.71052	0.21746	0.15916
	20% PEG	1.68319	0.75546	0.68485
	30% PEG	1.26417	0.3903	0.3408
c187238.graph_c0 GST
W4	Replicate/Well ID	Relative Quantity (dR)	Upper Error Bars	Lower Error Bars
	0	1	0.19422	0.16263
	10% PEG	0.59066	0.16701	0.14323
	20% PEG	4.41565	1.74807	1.07231
	30% PEG	7.68094	2.25271	1.89745
