# Supplementary material for: De novo assembly ofAmorpha fruticosaL. transcriptome in response to drought stress provides insight into the tolerance mechanisms
Source: PeerJ journal article supplement (doi:10.7717/peerj.11044), 2021-03-22
Supplement: Table_S1_Sequence_data_summary.xlsx [file Table_S1_Sequence_data_summary.xlsx]

## Sheet: Sheet1
Groups	#SampleID	ReadSum	BaseSum	GC(%)	N(%)	Q20(%)	CycleQ20(%)	Q30(%)
CK	T01	26782315	8008251062	43.92	0	97.04	100	93.2
CK	T02	25801487	7708555756	44	0	96.75	100	92.62
CK	T03	24720015	7393426318	44.19	0	96.93	100	92.95
0.2	T04	21193919	6340764538	44.04	0	96.34	100	91.64
0.2	T05	21053555	6297865170	43.94	0	96.57	100	92.11
0.2	T06	23045486	6891475758	43.88	0	96.61	100	92.26
