# Supplementary material for: De novo assembly ofAmorpha fruticosaL. transcriptome in response to drought stress provides insight into the tolerance mechanisms
Source: PeerJ journal article supplement (doi:10.7717/peerj.11044), 2021-03-22
Supplement: Table_S2_Unigene_assembly_imformation.xlsx [file Table_S2_Unigene_assembly_imformation.xlsx]

## Sheet: Sheet1
AmorphafruticosaLinn Unigene Length	Total Number	Percentage
200-300	28745	0.297586
300-500	18249	0.188925
500-1000	23539	0.24369
1000-2000	16177	0.167474
2000+	9884	0.102325
Total Number	96594
Total Length	83531131
N50 Length	1430
Mean Length	864.765
