# Supplementary material for: De novo assembly ofAmorpha fruticosaL. transcriptome in response to drought stress provides insight into the tolerance mechanisms
Source: PeerJ journal article supplement (doi:10.7717/peerj.11044), 2021-03-22
Supplement: Table_S3_Primers_imfromation.xlsx [file Table_S3_Primers_imfromation.xlsx]

## Sheet: Sheet1
	Unigene-ID	annotation	Primers	sequence (5'-3')
1	c162128.graph_c1	AfTubu	AfTubu.F	acaaggcggttaaggttggt
			AfTubu.R	gttctgggcttggttccctt
2	c168978.graph_c0	L-ascorbate peroxidase 2	c168978.3F	ttcggaccatttgaggga
			c168978.4R	aagacgagagggttgggt
3	c170704.graph_c0	Fe/Mn-superoxide dismutases -2	c170704.3F	gctccgcaatgacccaaaaa
			c170704.4R	cggtaggggaatcacccttg
4	c181732.graph_c3	Catalase isozyme 1	c181732.3F	cgtccatctagcgccttcaa
			c181732.4R	acacgttctgggatccgttc
5	c187238.graph_c0	glutathione s-transferase3	c187238.3F	attttgggagggctgaagca
			c187238.4R	caccggaggaatagccagtg
6	c194746.graph_c0	Abscisic acid-1	c194746.3F	ggattctgccacccctcaaa
			c194746.4R	ctgttttcttgcccgtgagc
7	c164531.graph_c0	Phospholipase A1	c164531.3F	tttgttggagtggccgaaga
			c164531.4R	tgcccctcccattgaatgtc
8	c185711.graph_c0	Phenylalanine ammonia-lyase 2	c185711.3F	acgcaacaatcaaccatgcc
			c185711.4R	acctgagagatcgtgaggct
9	c178617.graph_c0	Transcription factor MYB1R1	c178617.3F	ccacacccaccgtttatcca
			c178617.4R	tgaaaagccgacgatgacga
10	c161791.graph_c0	MYB transcription factor 2	c161791.3F	tgcatccgggtcgaataacc
			c161791.4R	tgcaattccacgccaatcac
11	c180821.graph_c0	responsive transcription factor RAP2-1	c180821.3F	tgggttcatacaccacagcc
			c180821.4R	catccactctagcgccaact
12	c177655.graph_c0	DREB4	c177655.3F	aggcacaccctcaaaaccaa
			c177655.4R	ccacaacagaacagcttggc
13	c175686.graph_c0	WRKY25	c175686.3F	caccggtatccatcgtccag
			c175686.4R	gtgcaaccgctgcagttaat
14	c169215.graph_c0	NAC1	c169215.3F	ccaacgcagggtatggagaa
			c169215.4R	tgtctgtgccagtagccttc
15	c188812.graph_c1	ADH_zinc_N	c188812.3F	gtttgtgttctgagctgcgg
			c188812.4R	aatacaacgcaggctctccc
16	c147972.graph_c0	zinc finger protein ZAT10	c147972.3F	caccttgggcgaaacgaaag
			c147972.4R	gtccaccgagtgcttggtaa
17	c164358.graph_c0	bHLH-MYC transcription factors N	c164358.3F	aaccaccggttctatgcgtt
			c164358.4R	atgcacccatcaacctagcc
18	c195189.graph_c0	NADH-cytochrome	c195189.3F	ctcaaaccccctcattcccc
			c195189.4R	atcaacatgcgagggaagca
19	c149356.graph_c0	Thioredoxin 2	c149356.3F	tcatcgtcccgcattctcac
			c149356.4R	atgttggcattgcttgcacc
20	c192029.graph_c1	Auxin-binding protein ABP19a	c192029.3F	ccttggcatttccattgccc
			c192029.4R	aggattcgcactaccgaagc
21	c194398.graph_c0	WRKY20	c194398.3F	gagtccgacgtcgtttttgg
			c194398.4R	ttcaacaggagcactagccc
